# Supplementary material for: Theoretical and experimental study of the microstructure of a metallic melt in an In50Bi50 alloy based on the Wulff cluster model
Source: Royal Society of Chemistry journal article supplement (doi:10.1039/d2cp00674j), 2022-01-01
Supplement: d2cp00674j1.pdf [file d2cp00674j1.pdf]

## Supporting Materials

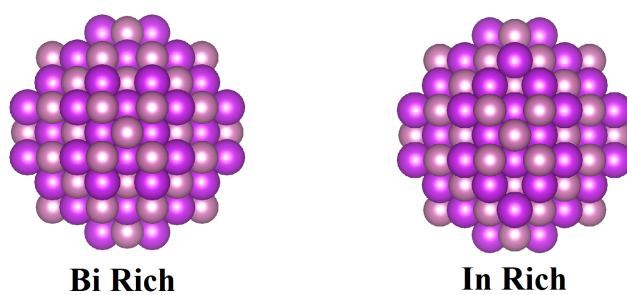

(a) 160°C

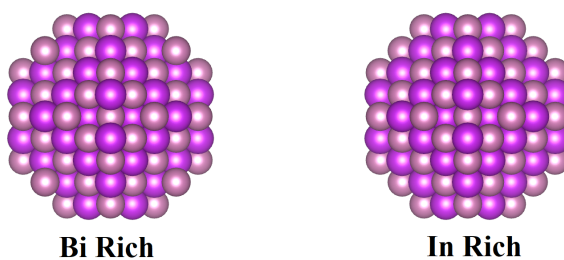

(b) 140°C

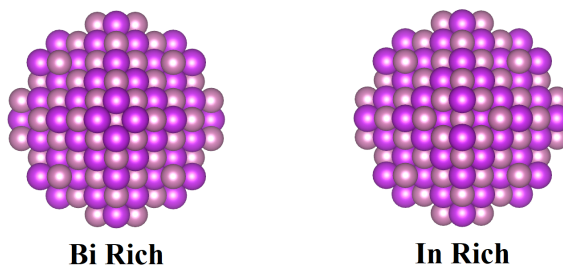

(c) 120°C

Fig.S 1: The atomic structures of InBi cluster at the condition of Bi rich and In rich at (a) 160°C, (b) 140°C and (c) 120°C
